# Supplementary figures and images for: Neurogenin 3+ cells contribute to β-cell neogenesis and proliferation in injured adult mouse pancreas
Source: PubMed Central journal article supplement — Cell Death Dis. 2013 Mar 7;4(3):e523–. doi: 10.1038/cddis.2013.52 (PMC3613830; doi:10.1038/cddis.2013.52), 2013-03-07

Figure S7.

A

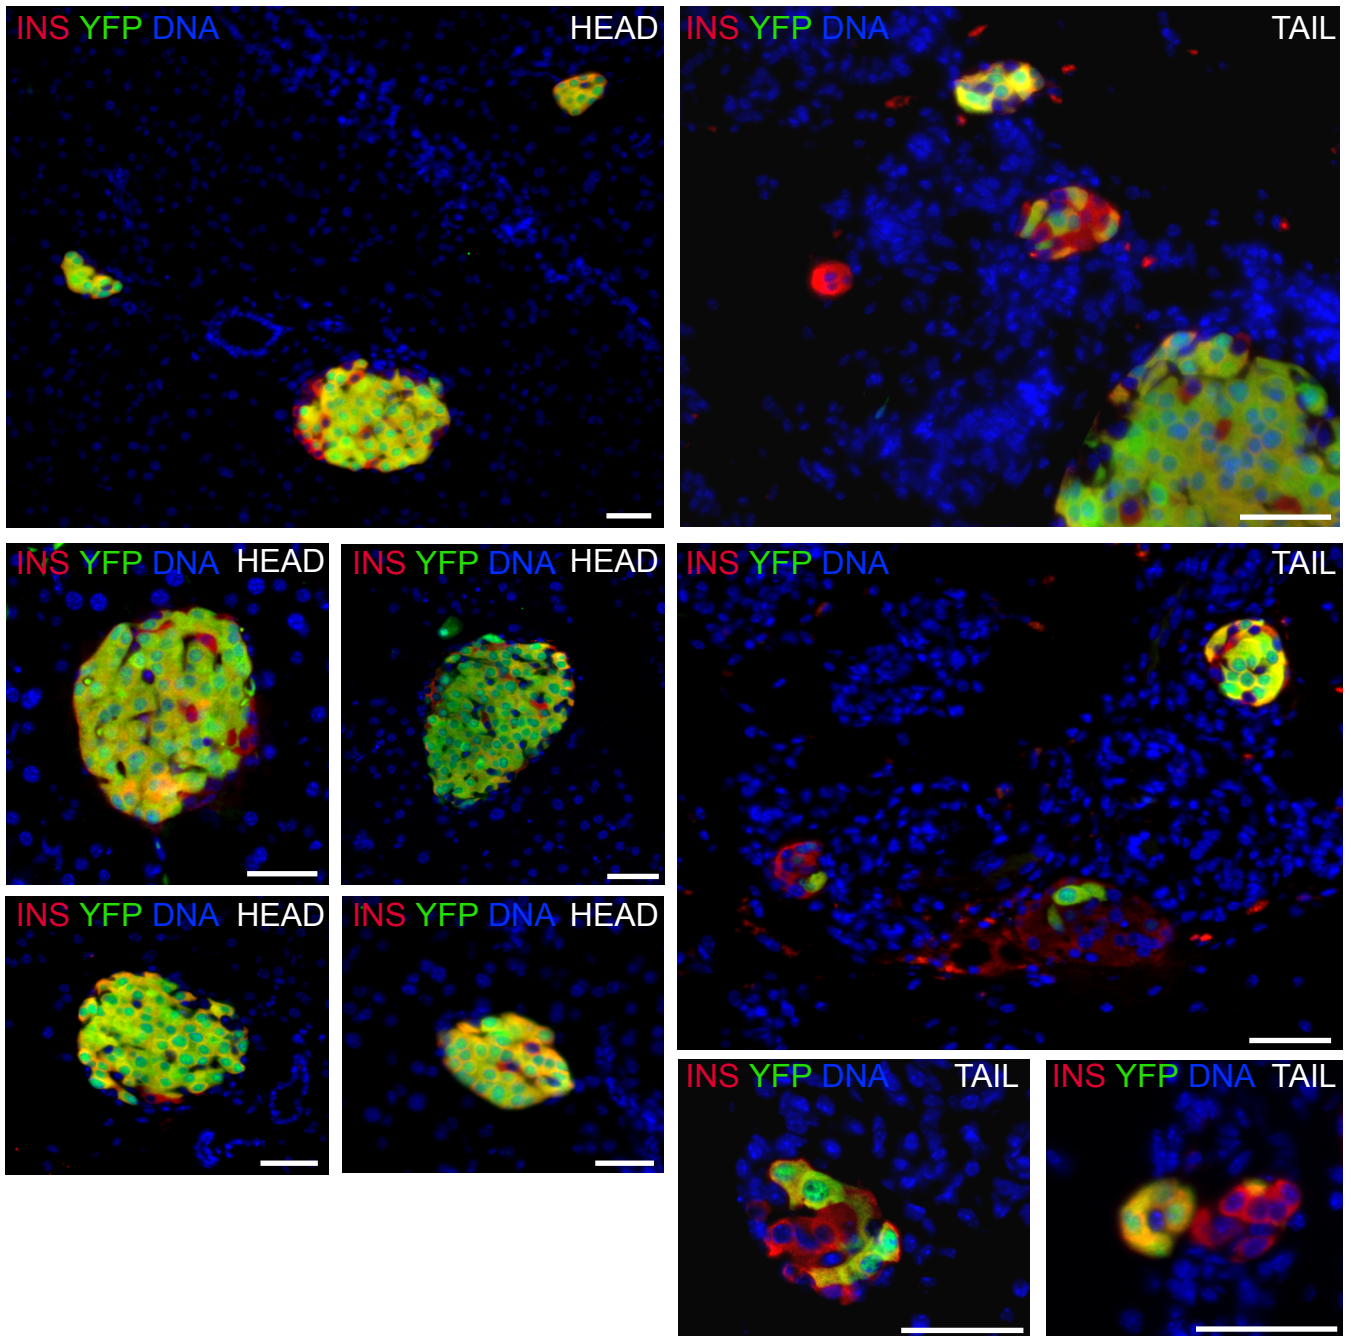

B

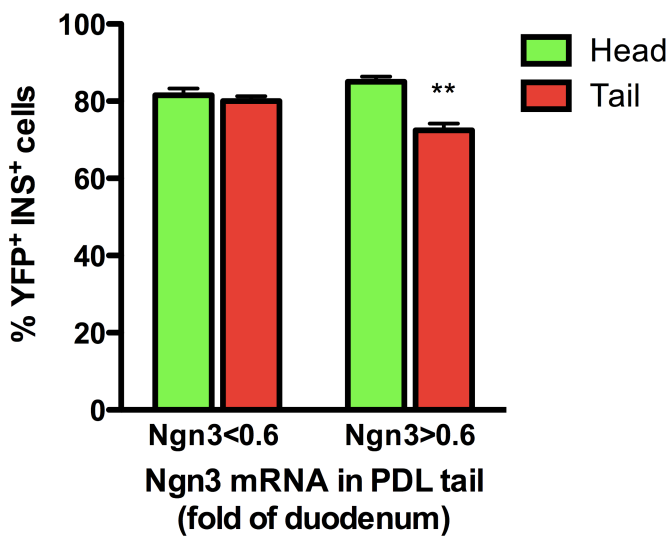

Supplement: cddis201352x10.pdf [file cddis201352x10.pdf]

Figure S8.

A

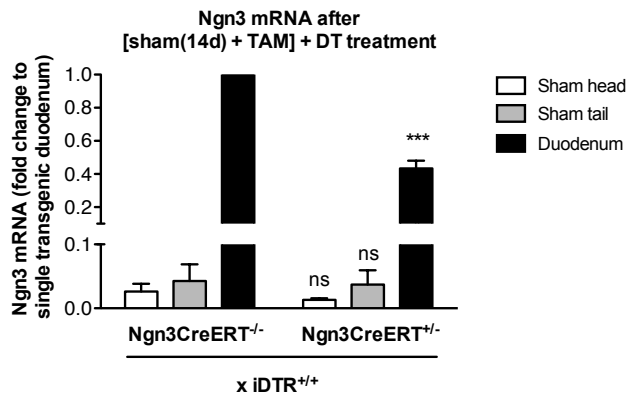

B

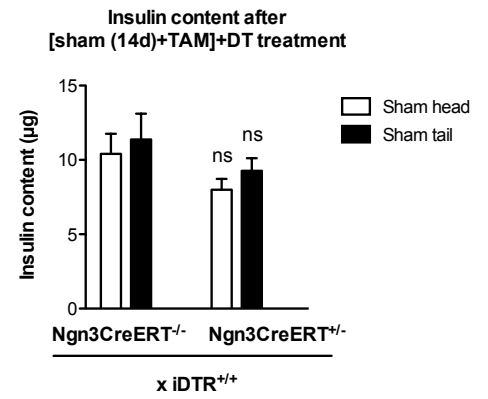

C

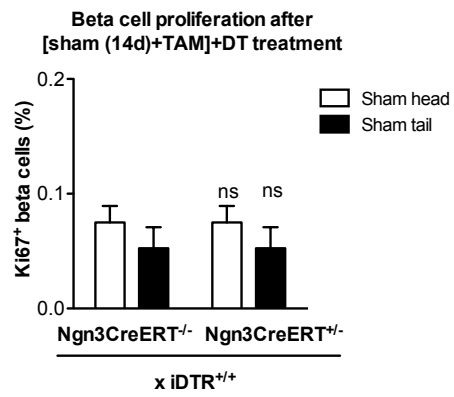

Supplement: cddis201352x11.pdf [file cddis201352x11.pdf]

Figure S1.

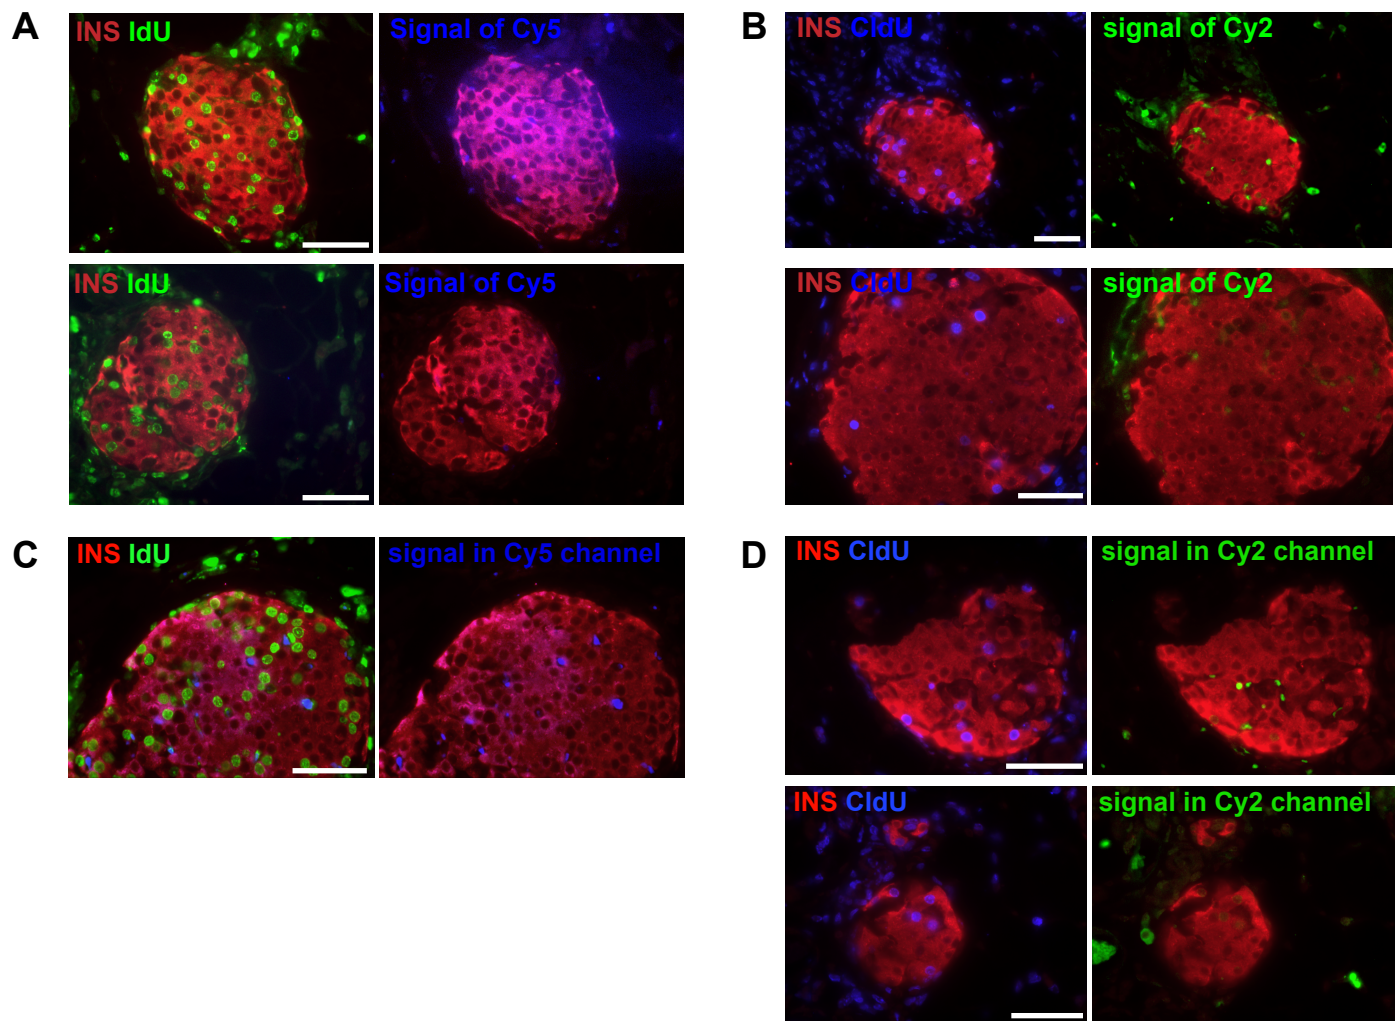

Supplement: cddis201352x2.pdf [file cddis201352x2.pdf]

Figure S2

A

Neonatal CldU P5 + IdU P6

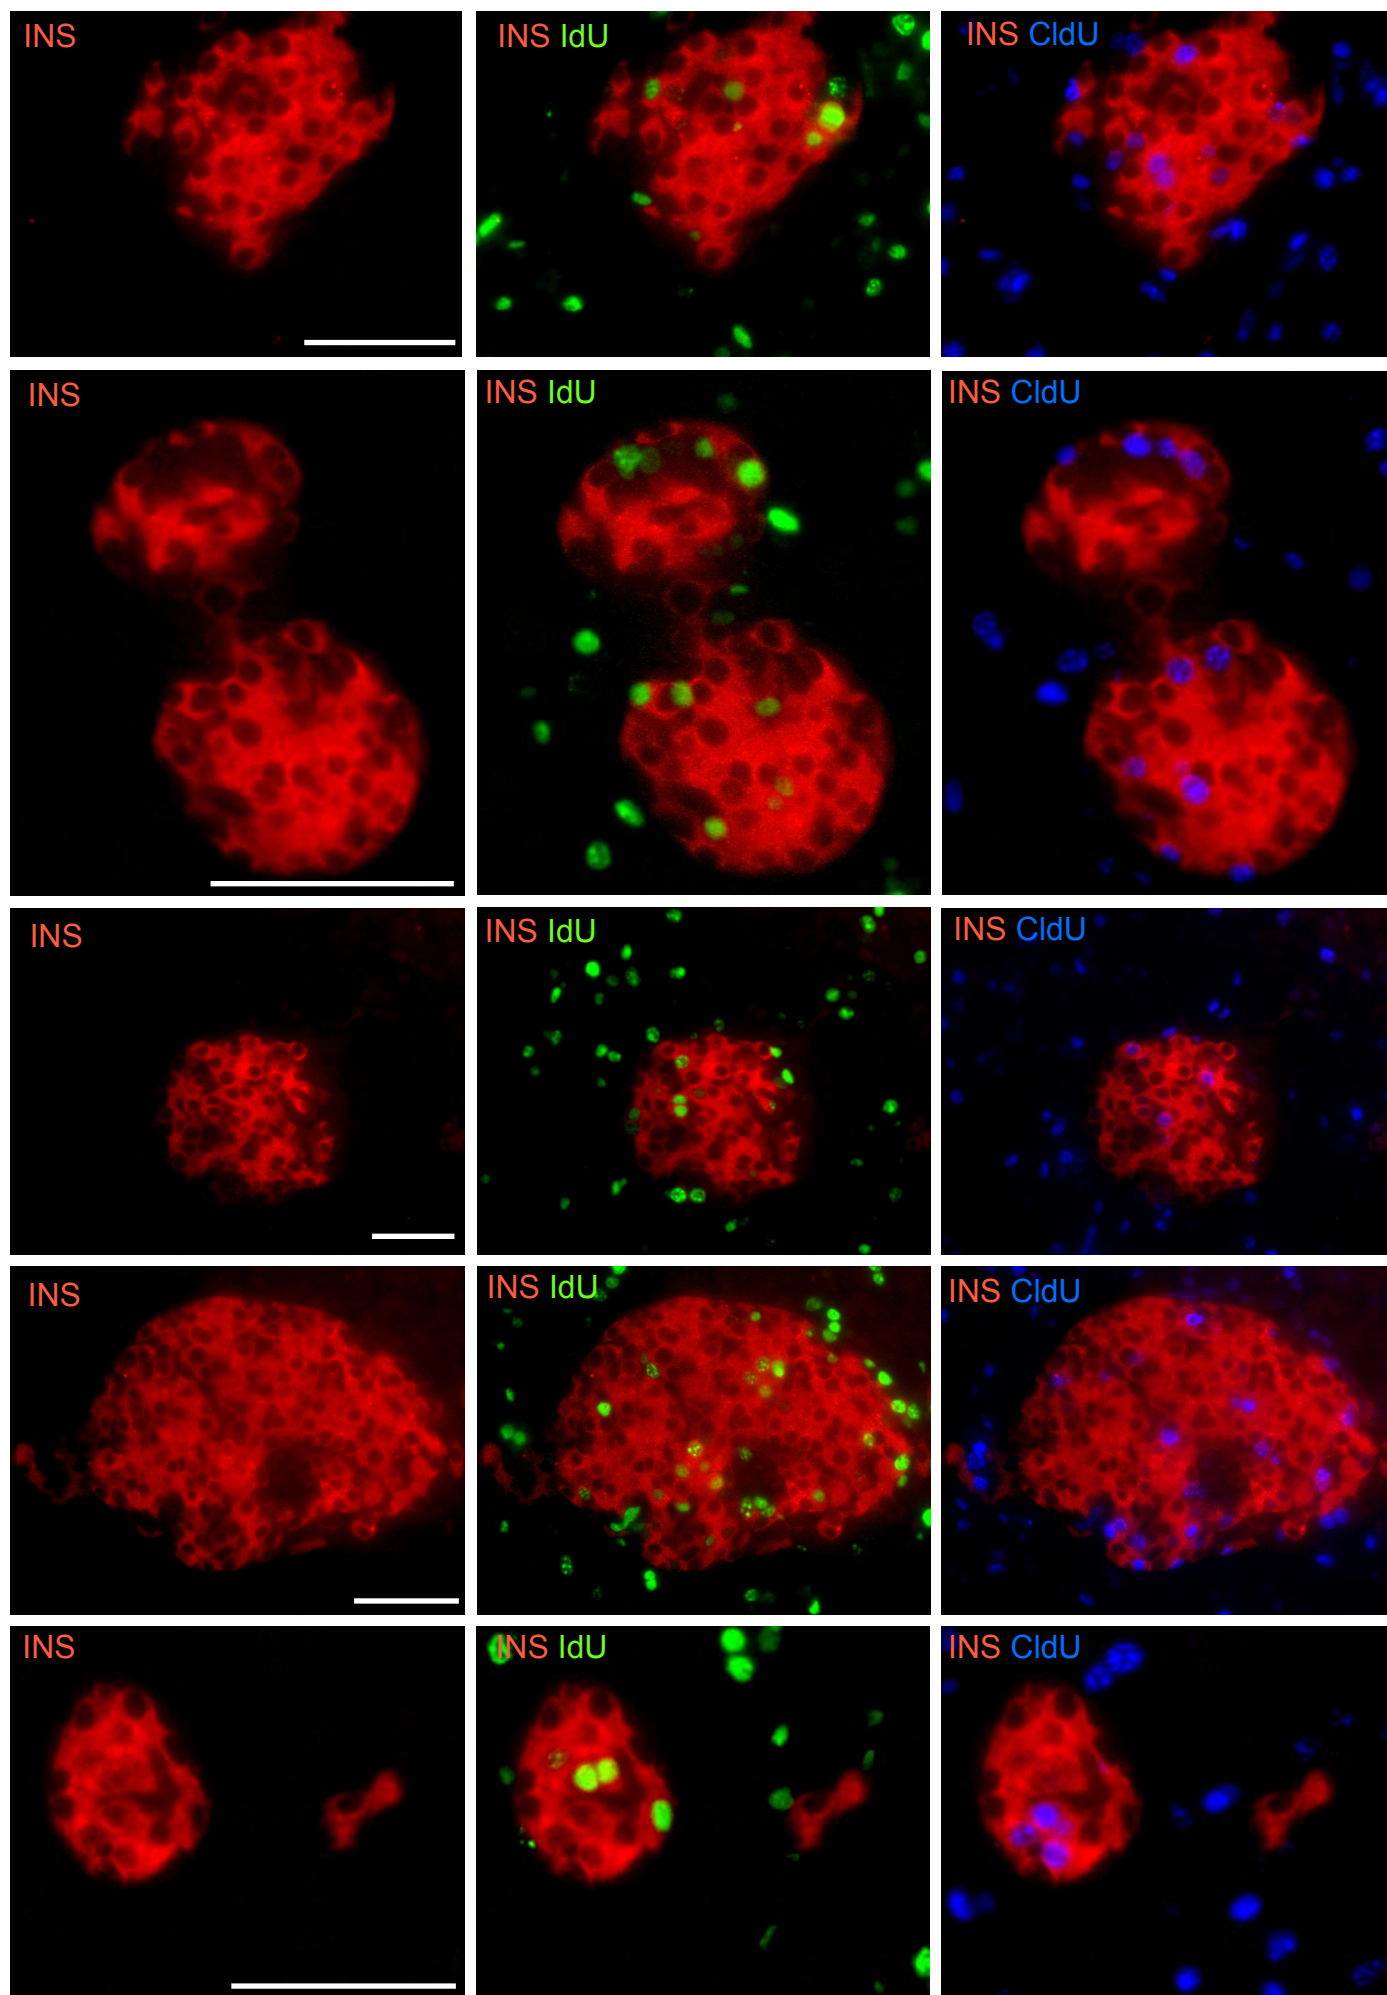

Supplement: cddis201352x3.pdf [file cddis201352x3.pdf]

**Figure S2.**

**B**

Balb/c PDL : 3 days CldU + 3 days IdU

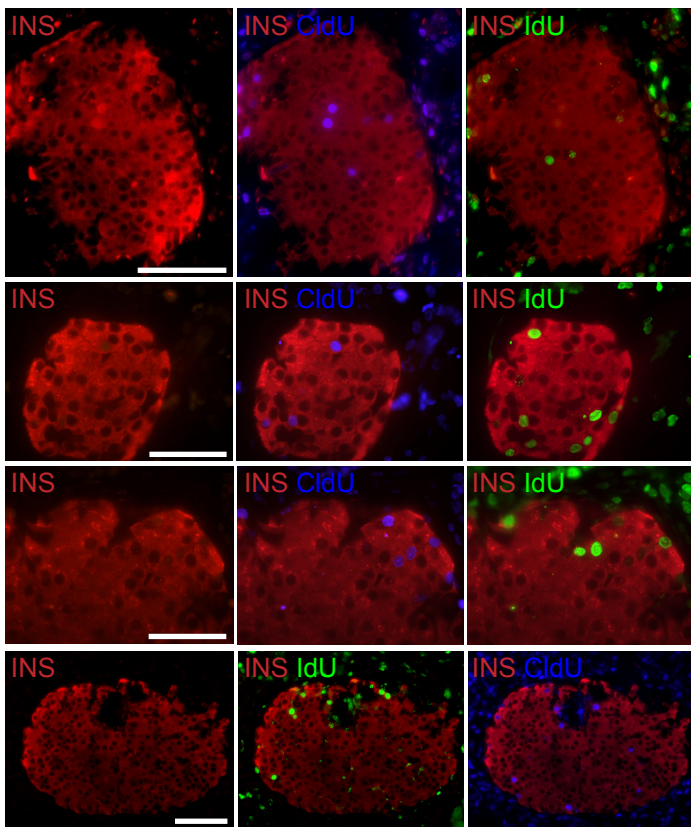

**C**

Balb/c PDL : 7 days CldU + 7 days IdU

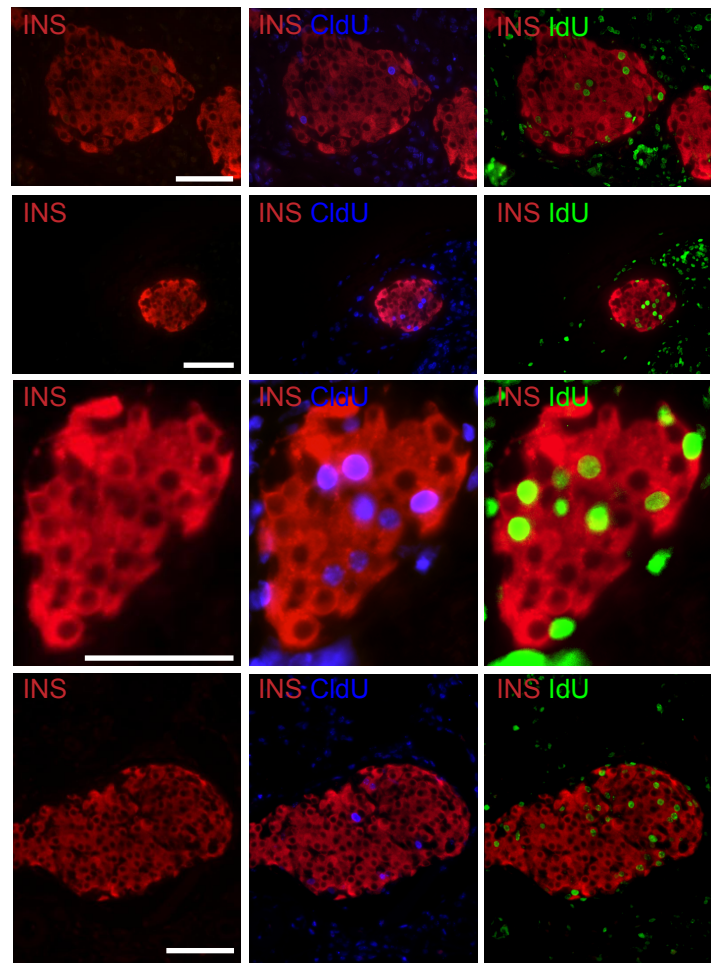

**D**

Balb/c PDL : 7 days CldU + 28 days IdU

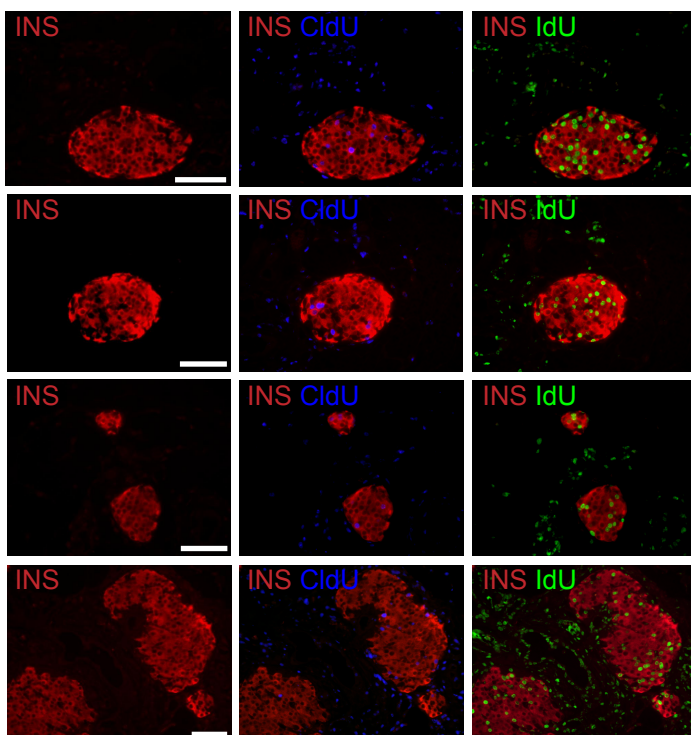

Supplement: cddis201352x4.pdf [file cddis201352x4.pdf]

Figure S3.

Balb/c PDL : 7 days CldU + 7 days IdU  
Confocal analysis

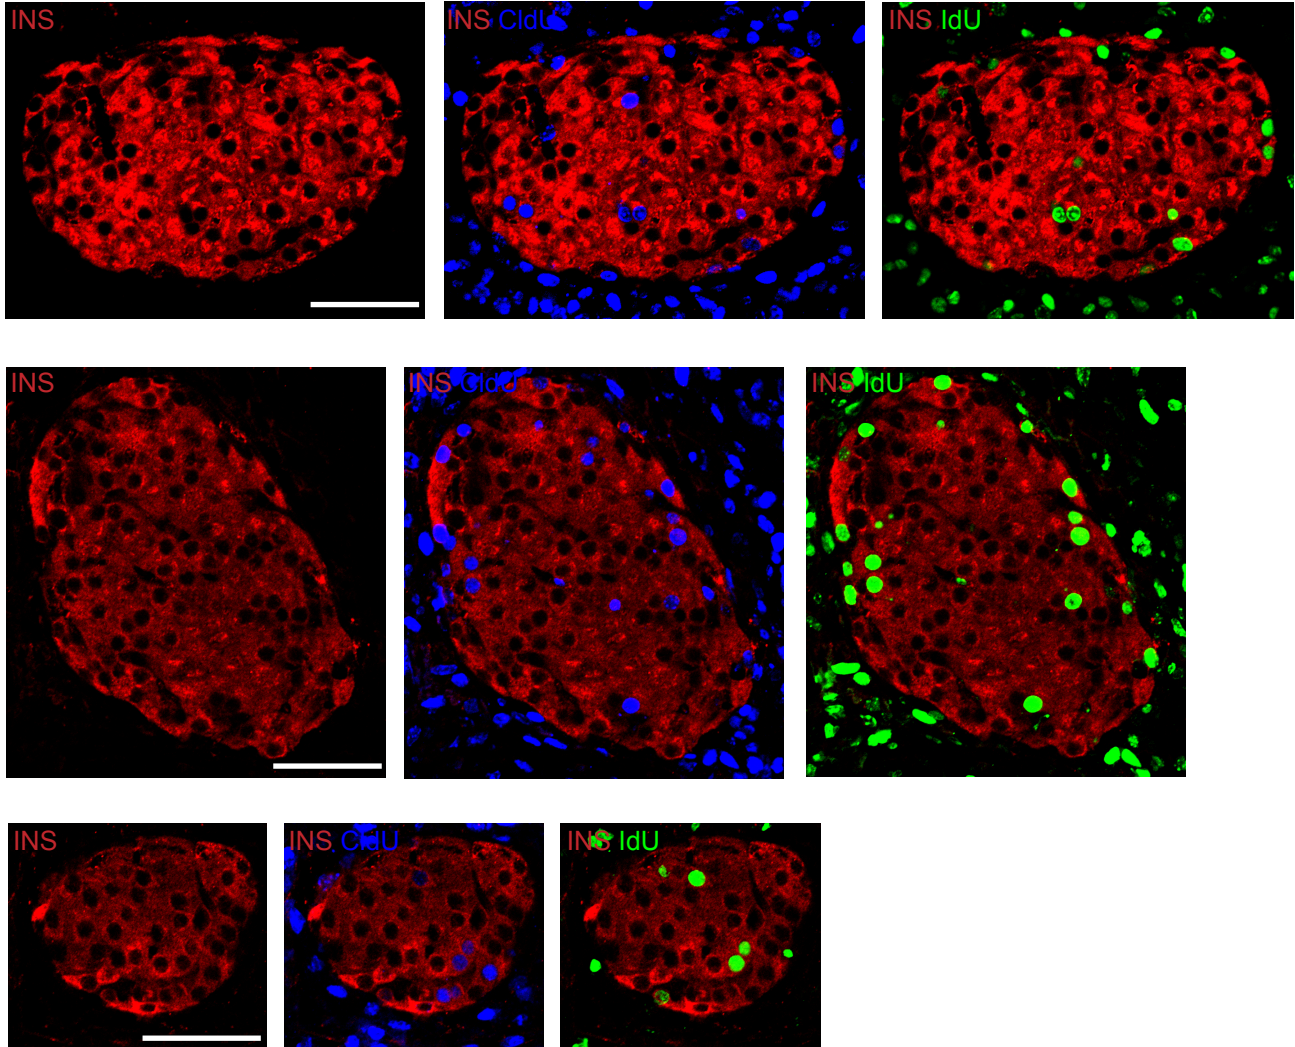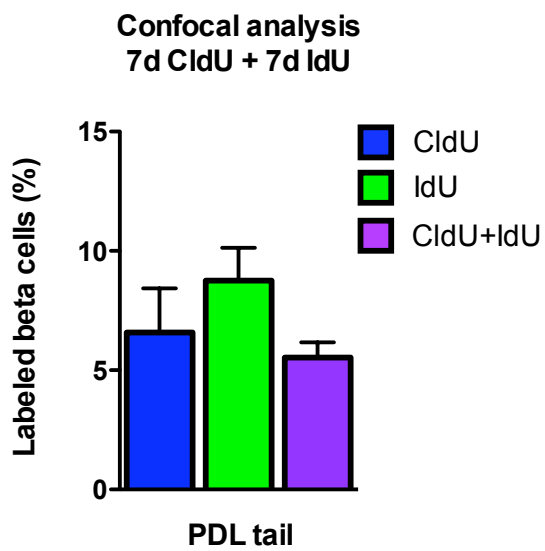

Supplement: cddis201352x5.pdf [file cddis201352x5.pdf]

Figure S5A-C.

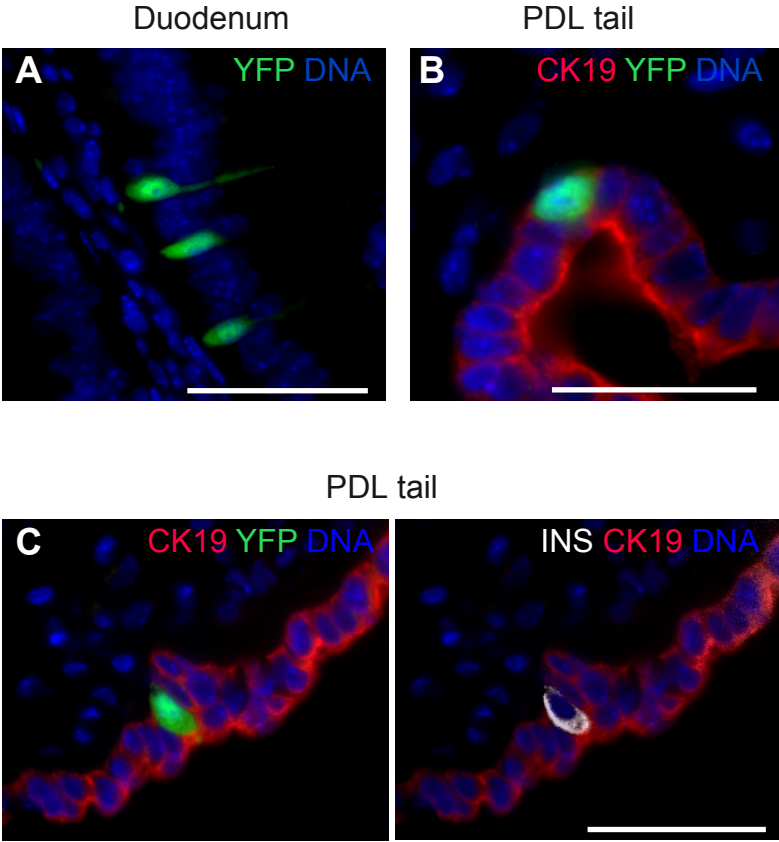

Supplement: cddis201352x7.pdf [file cddis201352x7.pdf]

Figure S5D.

D

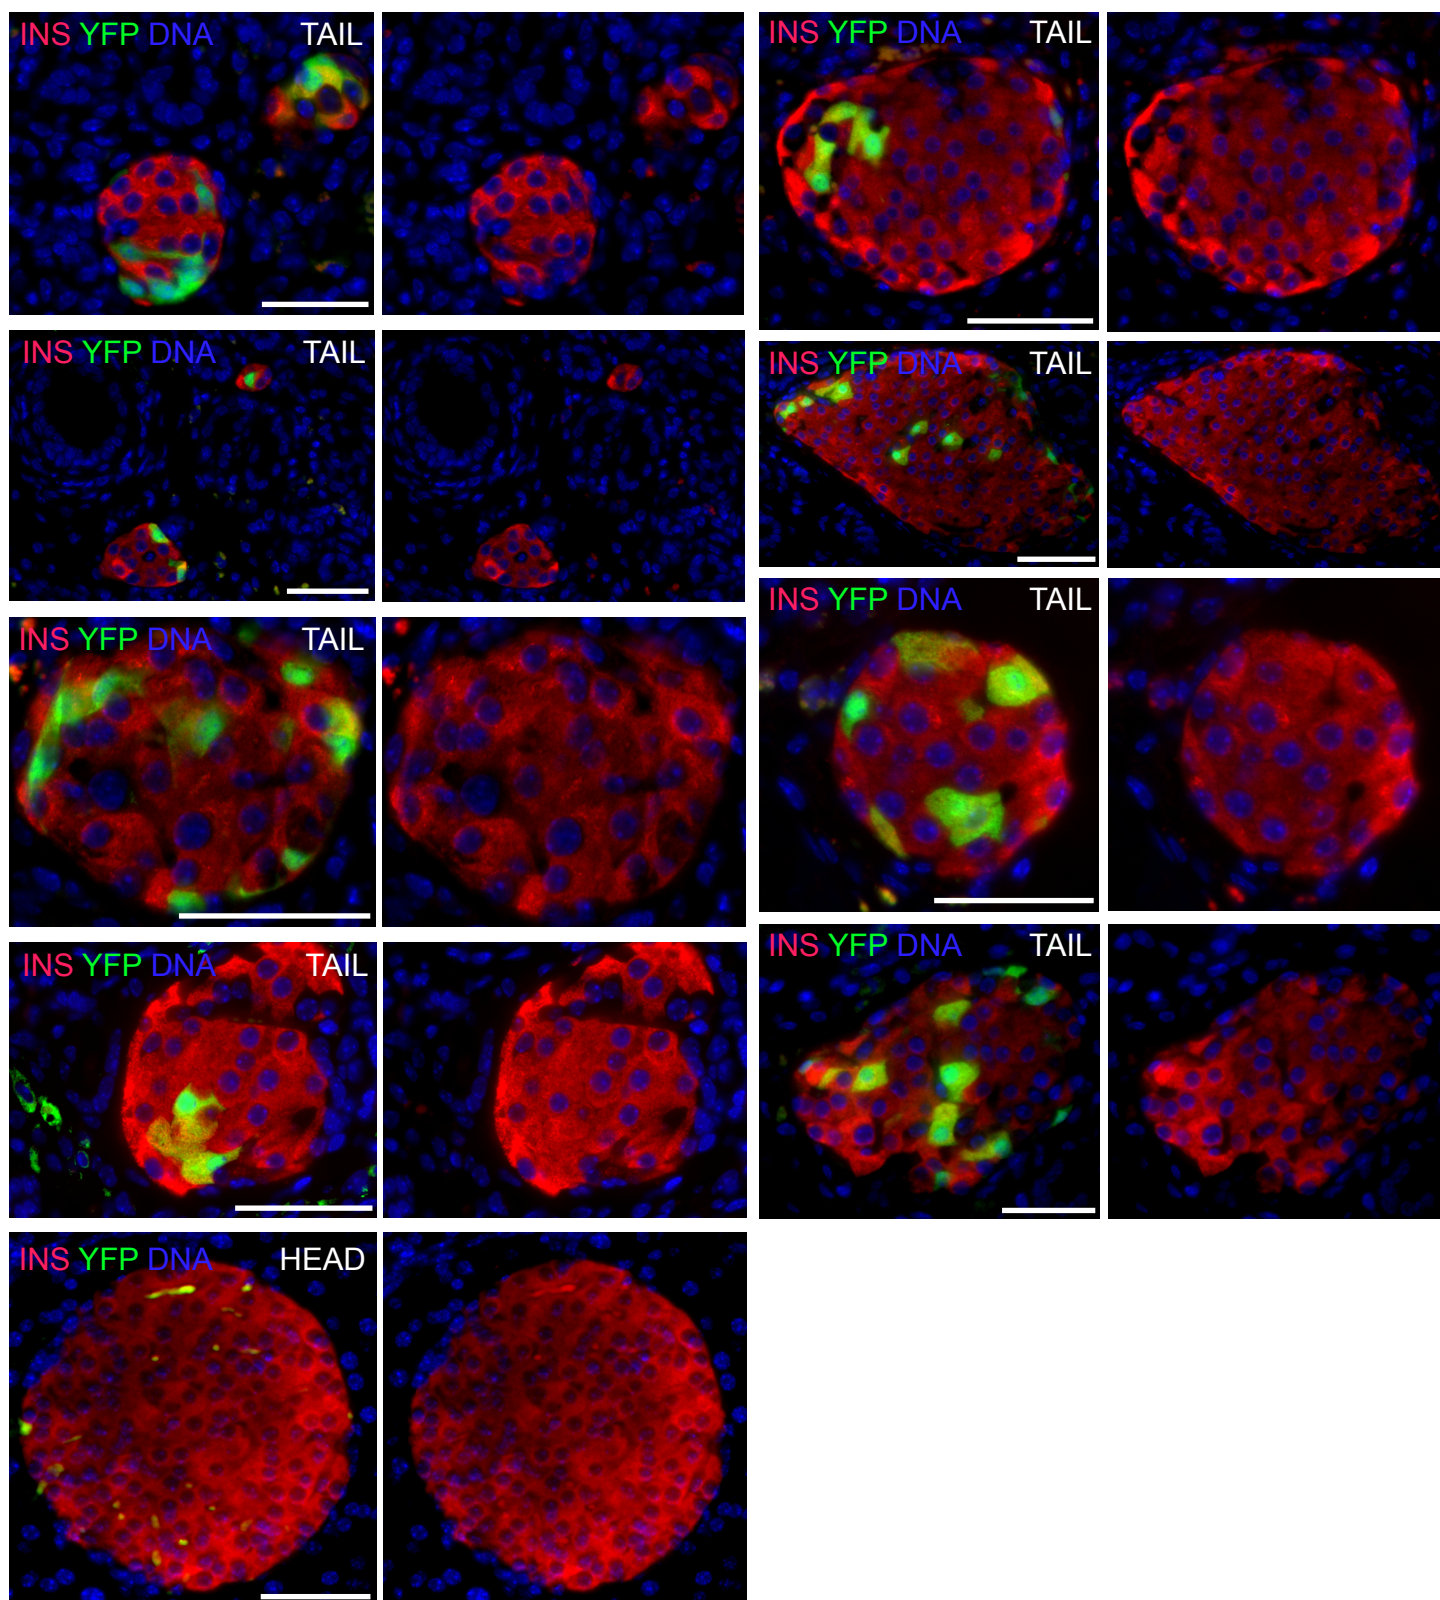

Supplement: cddis201352x8.pdf [file cddis201352x8.pdf]

Figure S6.

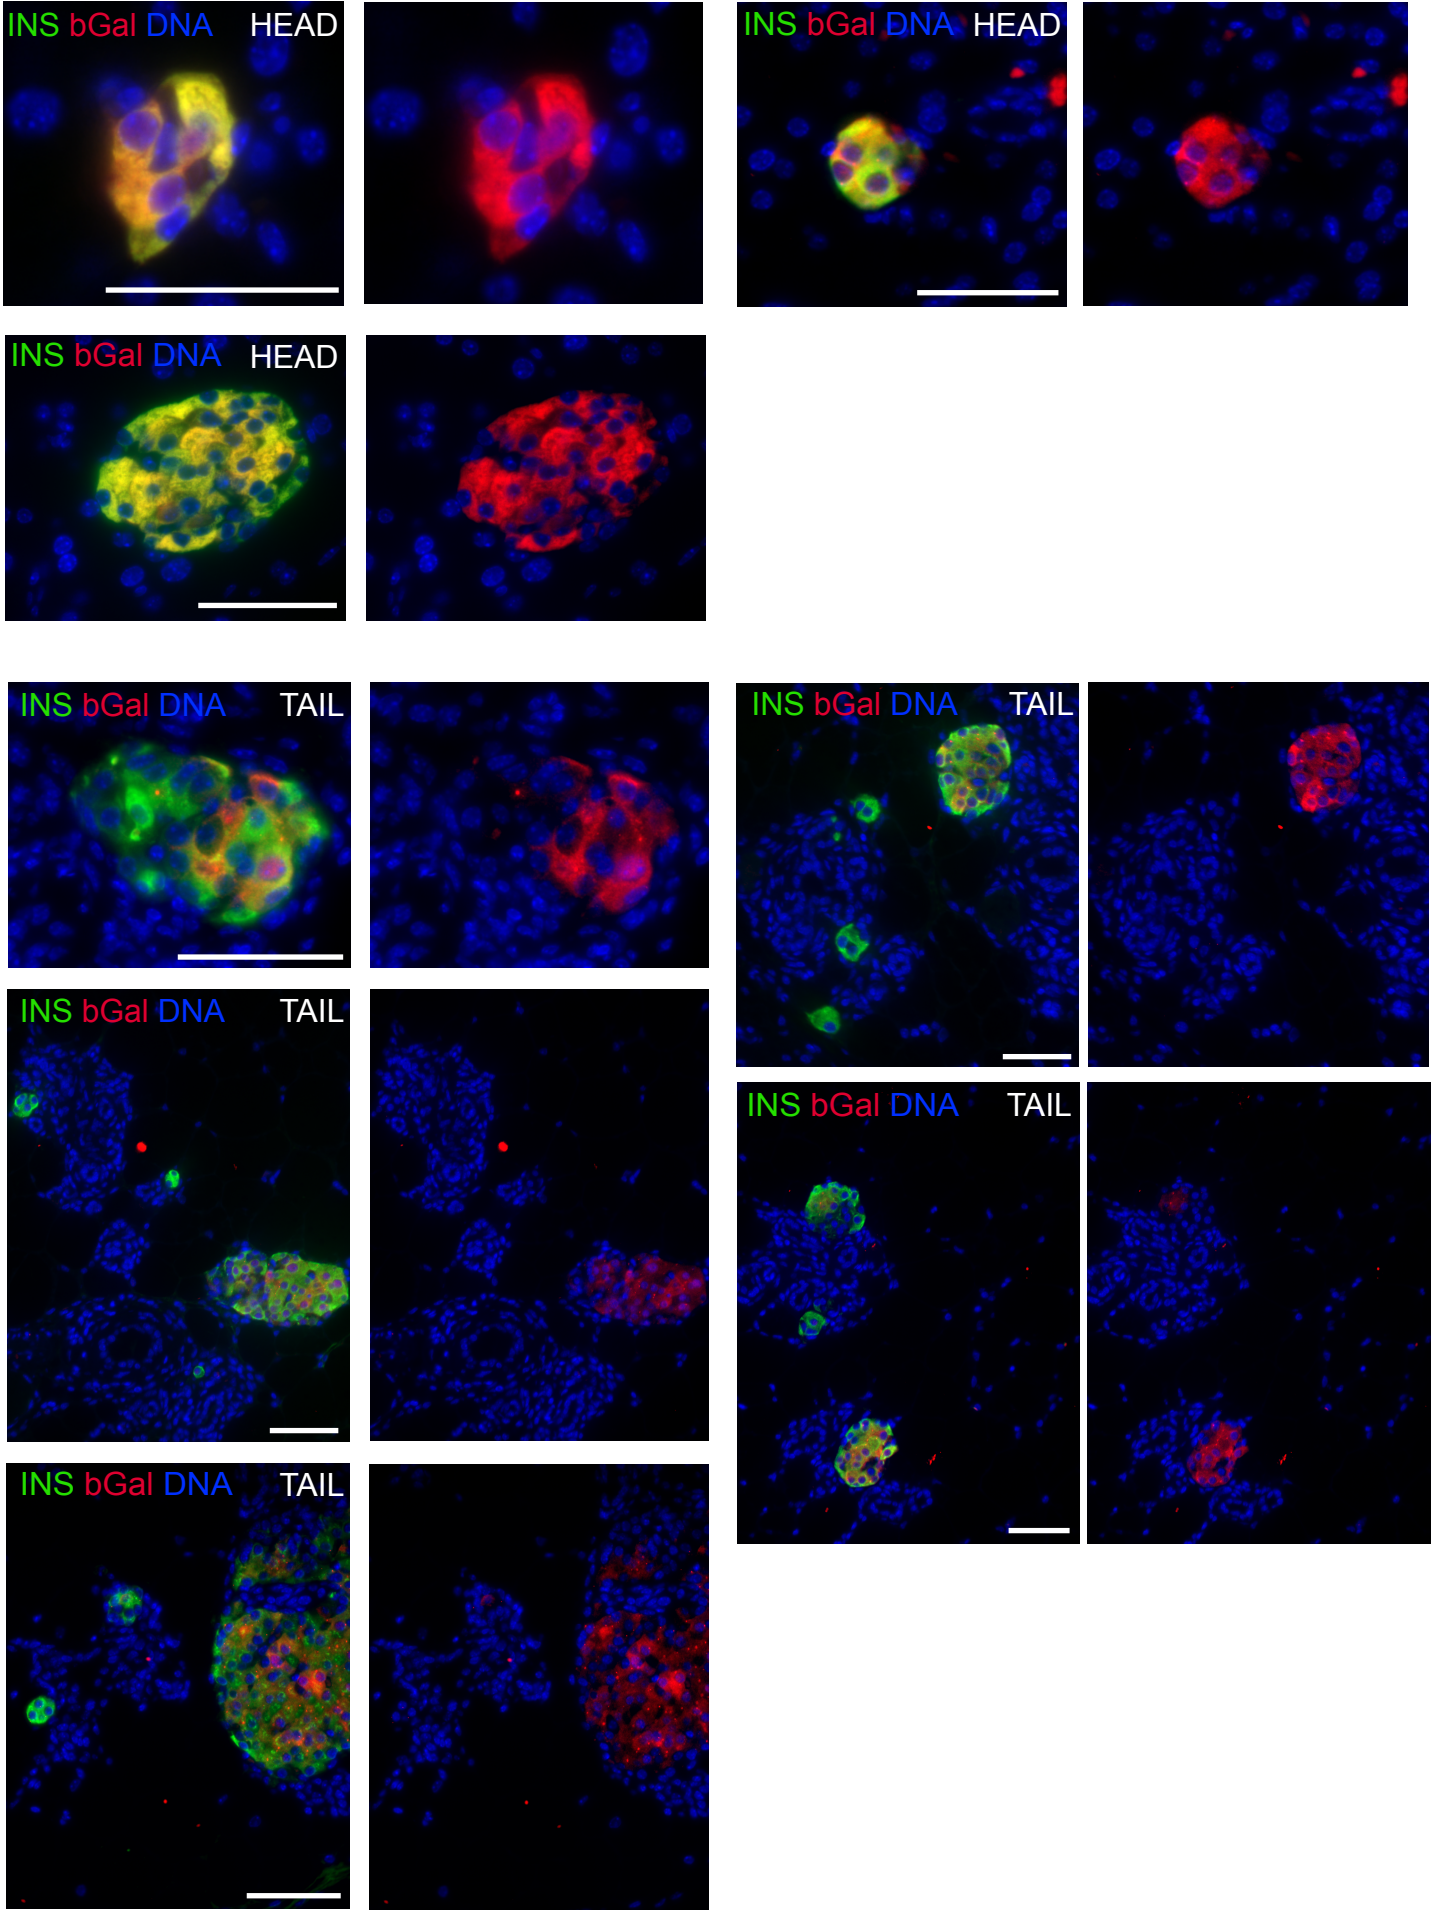

Supplement: cddis201352x9.pdf [file cddis201352x9.pdf]
